# Supplementary material for: Trauma, Resilience, and Mental Health in Migrant and Non-Migrant Youth: An International Cross-Sectional Study Across Six Countries
Source: PubMed Central journal article supplement (PMC7073329; doi:10.3389/fpsyt.2019.00997), 2020-03-09

**Supplementary Figure 1:**

Means and SE bars for significant interaction effects of trauma by migrancy for COMPAS-W subscales: (a) Composure, (b) Mastery, (c) Positivity, (d) Achievement, and (e) Satisfaction.

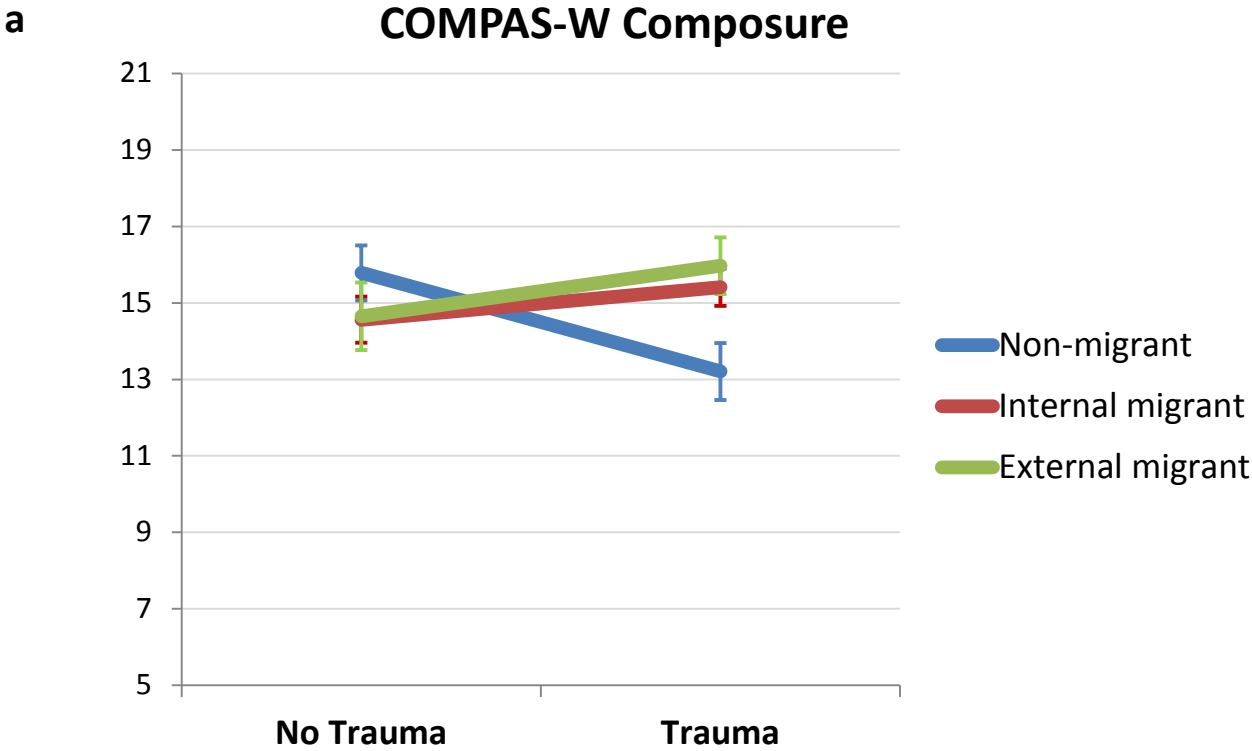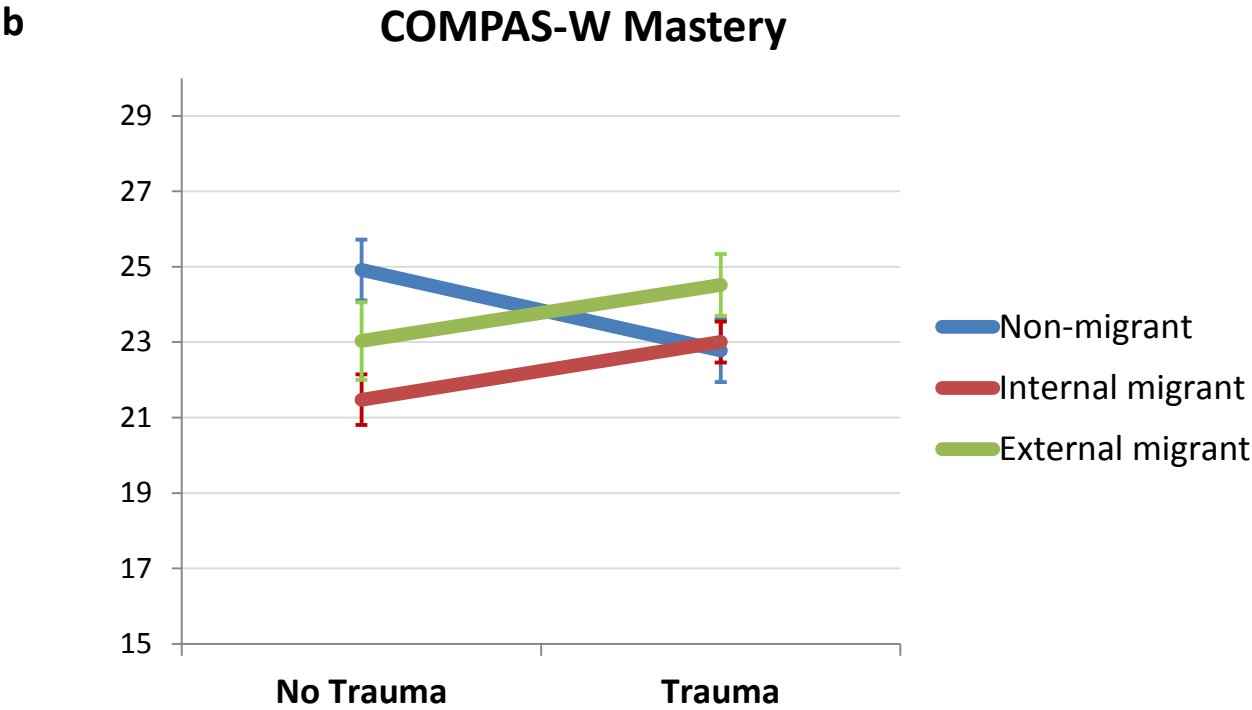

c

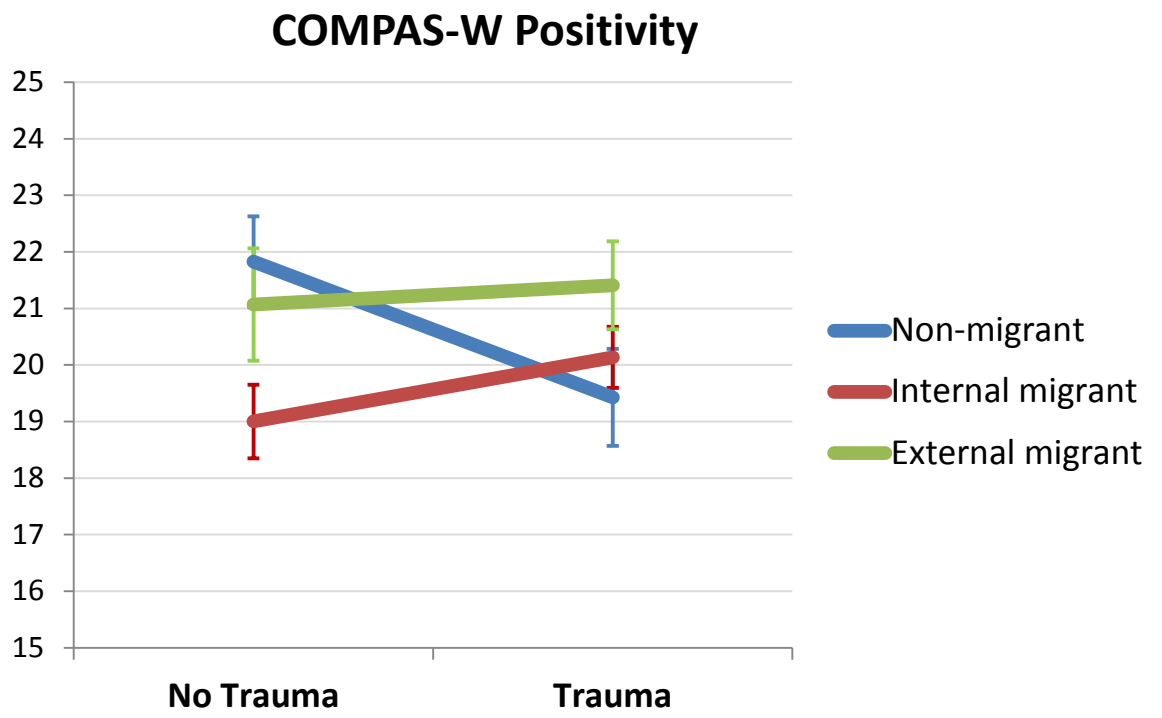

d

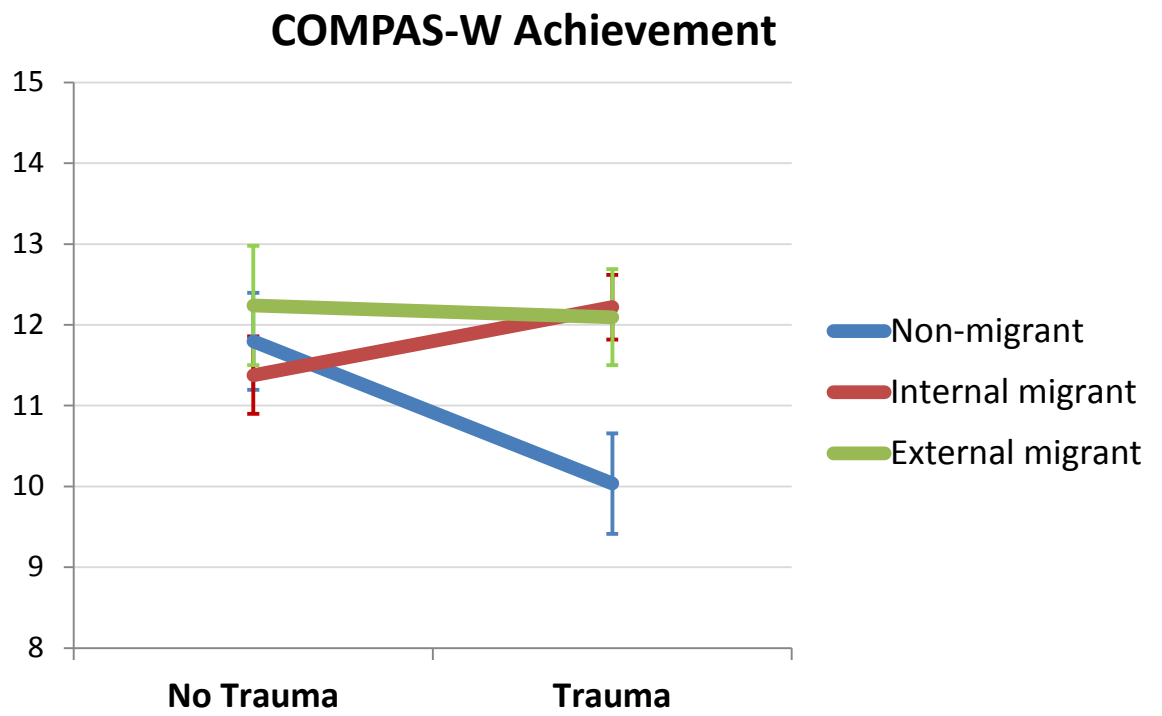

e

### COMPAS-W Satisfaction

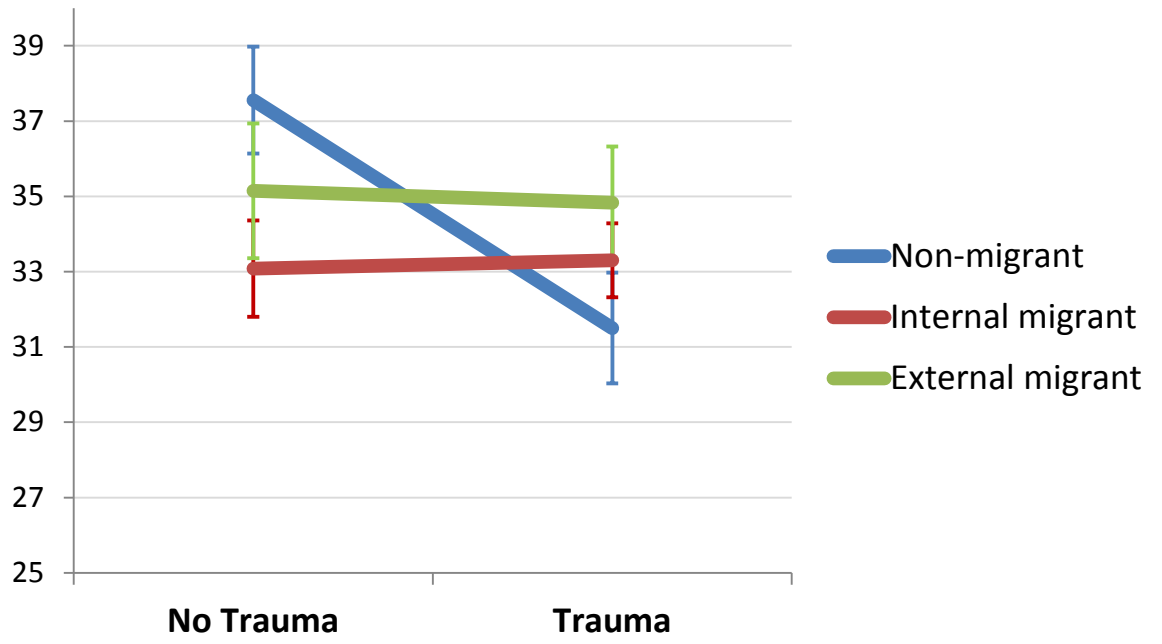

Supplement: Image_1.pdf [file Image_1.pdf]
